# Supplementary material for: Impact of High-Risk Sex and Focused Interventions in Heterosexual HIV Epidemics: A Systematic Review of Mathematical Models
Source: PubMed Central journal article supplement (PMC3511305; doi:10.1371/journal.pone.0050691), 2012-11-30

**Figure S2**  
**Fraction of HIV infections prevented (prevented fraction, %) following a focused intervention.**

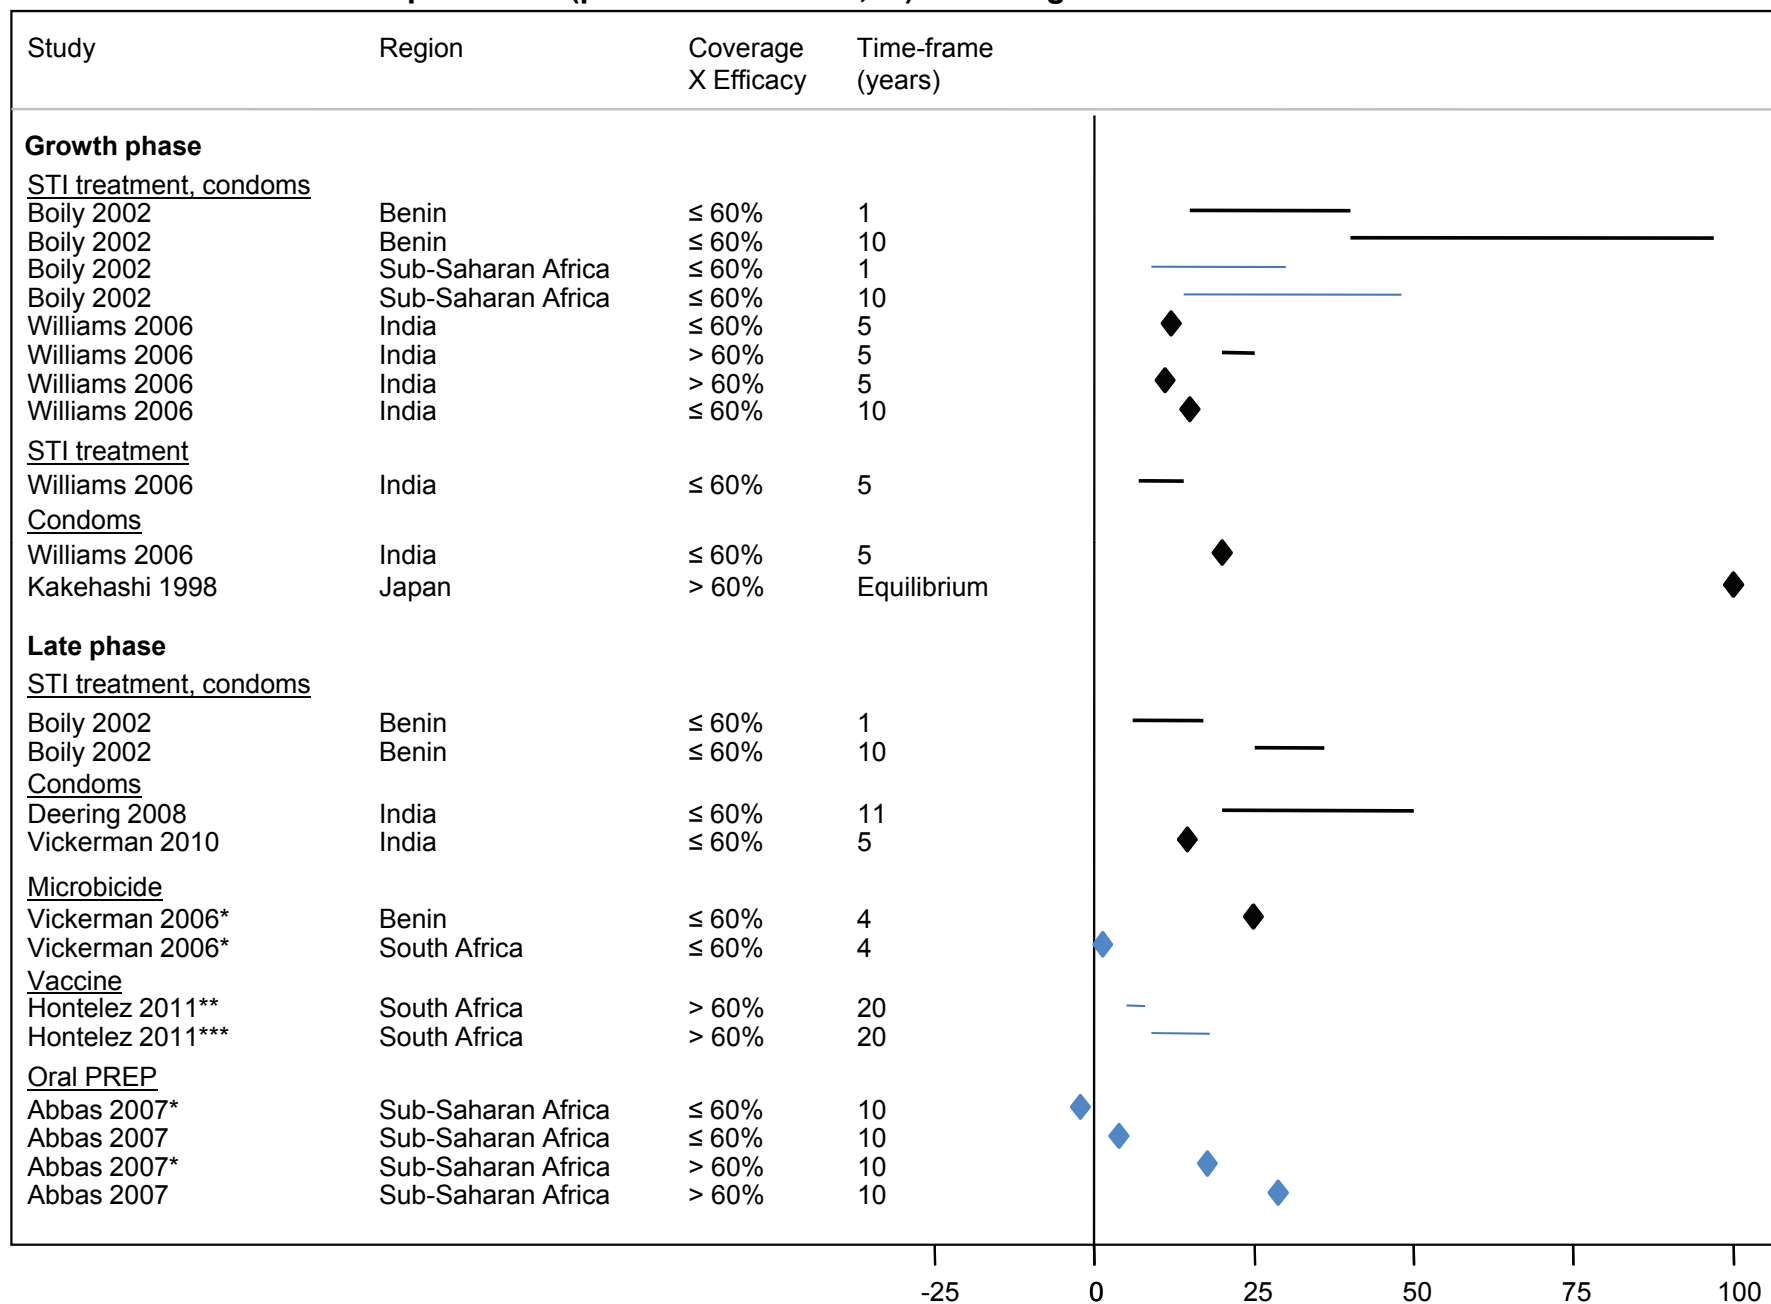

Supplement: pone.0050691.s002.pdf [file pone.0050691.s002.pdf]
