# Supplementary material for: Impact of High-Risk Sex and Focused Interventions in Heterosexual HIV Epidemics: A Systematic Review of Mathematical Models
Source: PubMed Central journal article supplement (PMC3511305; doi:10.1371/journal.pone.0050691), 2012-11-30

**Figure S5**

**Relative reduction in overall incidence following a focused intervention (%)**

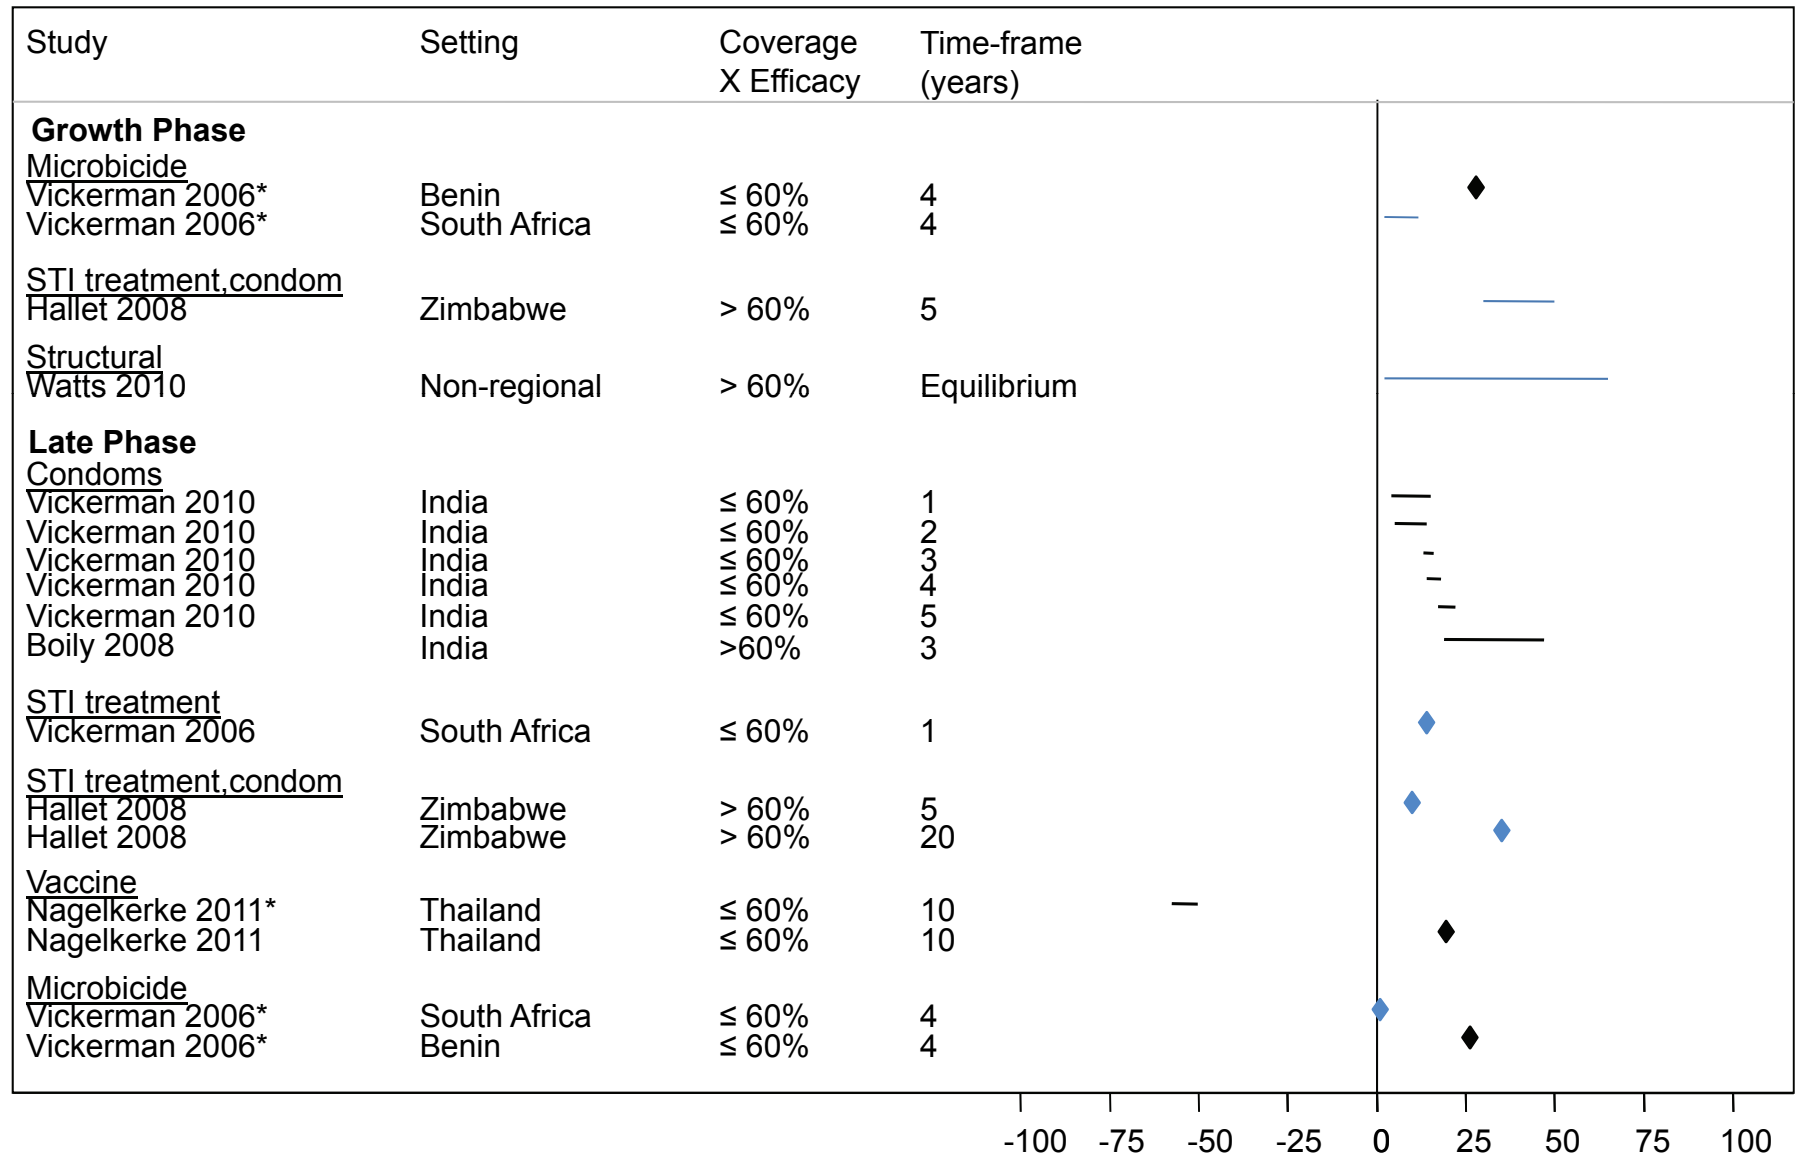

Supplement: pone.0050691.s005.pdf [file pone.0050691.s005.pdf]
